# Supplementary material for: Insight into the effects of calcination temperature on the structure and performance of RuO2/TiO2 in the Deacon process
Source: Royal Society of Chemistry journal article supplement (doi:10.1039/d2cy00812b), 2022-01-01
Supplement: d2cy00812b1.pdf [file d2cy00812b1.pdf]

**Electronic Supplementary Information (ESI)**

**For**

**Insight into the effects of calcination temperature on the structure-performance of RuO<sub>2</sub>/TiO<sub>2</sub> in the Deacon process**

Siyao Li,<sup>a</sup> Bowen Xu,<sup>a</sup> Yuexia Wang,<sup>a</sup> Yupei Liu,<sup>a</sup> Xinqing Lu,<sup>\*a,b</sup> Rui Ma,<sup>a,b</sup> Yanghe Fu,<sup>a,b</sup> Shuhua Wang,<sup>c</sup> Liyang Zhou<sup>c</sup> and Weidong Zhu<sup>\*a,b,c</sup>

<sup>a</sup> *Zhejiang Engineering Laboratory for Green Syntheses and Applications of Fluorine-Containing Specialty Chemicals, Institute of Advanced Fluorine-Containing Materials, Zhejiang Normal University, 321004 Jinhua, People's Republic of China*

<sup>b</sup> *Key Laboratory of the Ministry of Education for Advanced Catalysis Materials, Institute of Physical Chemistry, Zhejiang Normal University, 321004 Jinhua, People's Republic of China*

<sup>c</sup> *National Engineering Technology Research Center of Fluoro-Materials, Zhejiang Juhua Technology Center Co., Ltd., 324004 Quzhou, People's Republic of China*

\*To whom correspondence should be addressed.

Tel./Fax: +86 579 82282234; E-mail: [xinqinglu@zjnu.cn](mailto:xinqinglu@zjnu.cn) (X. Lu);

Tel./Fax: +86 579 82282932; E-mail: [weidongzhu@zjnu.cn](mailto:weidongzhu@zjnu.cn) (W. Zhu)

## Mass Transfer Calculation for HCl Oxidation over RuO<sub>2</sub>/TiO<sub>2</sub>

The effects of internal and external transfer limitations on reaction kinetics were evaluated by the Mears ( $C_M$ ) and Weisz-Prater ( $C_{WP}$ ) criteria, respectively,<sup>1,2</sup> which were calculated using the following formulas:

$$C_M = \frac{nr_{\text{obs}}\rho_{\text{catal.}}R_{\text{catal.}}}{k_c C_{\text{HCl}}} \quad (\text{S1})$$

$$C_{WP} = \frac{r_{\text{obs}}\rho_{\text{catal.}}R_{\text{catal.}}^2}{D_{\text{eff}}C_{\text{HCl,s}}} \quad (\text{S2})$$

where  $n$  is the reaction order,  $r_{\text{obs}}$  is the observed reaction rate,  $\rho_{\text{catal.}}$  is the bulk density of catalyst bed,  $R_{\text{catal.}}$  is the particle radius of catalyst,  $k_c$  and  $D_{\text{eff}}$  are the external mass transfer coefficient and effective diffusion coefficient, respectively,  $C_{\text{HCl}}$  and  $C_{\text{HCl,s}}$  are the bulk concentration of HCl and the HCl concentration on the surface of a catalyst particle, respectively.  $C_{\text{HCl,s}}$  is equal to  $C_{\text{HCl}}$  when the external transfer limitation is excluded.

$k_c$  was estimated by the combination of Sherwood number  $Sh$ , the Reynolds number  $Re_p$ , and the Schmidt number  $Sc$  using the following formulas:

$$Sh = \frac{k_c d_{\text{catal.}}}{D_{\text{eff}}} = 2 + 0.6Re_p^{1/2} Sc^{1/3} \quad (\text{S3})$$

$$Re_p = \frac{U\rho d_{\text{catal.}}}{\mu} \quad (\text{S4})$$

$$Sc = \frac{\mu}{D_{\text{eff}}\rho} \quad (\text{S5})$$

Where  $d_{\text{catal.}}$  is the catalyst particle size,  $U$  is the free-stream velocity,  $\rho$  and  $\mu$  are the density and viscosity of a feed mixture, which can be obtained from Aspen Plus software.

$D_{\text{eff}}$  was estimated by the combination of the coefficients for Knudsen diffusion  $D_A^K$  and bulk diffusion  $D_A^b$  using the following formulas:

$$\frac{1}{D_{\text{eff}}} = \frac{1}{D_A^K} + \frac{1}{D_A^b} \quad (\text{S6})$$

$$D_A^K = \frac{2}{3} r_{\text{po}} \sqrt{\frac{8RT}{\pi M_i}} \frac{\varepsilon}{\tau} \quad (\text{S7})$$

$$r_{\text{po}} = 4 \frac{\varepsilon}{S_{\text{catal.}} \rho_{\text{catal.,g}}} \quad (\text{S8})$$

$$D_A^b = D_A \frac{\varepsilon}{\tau} \quad (\text{S9})$$

where  $r_{\text{po}}$ ,  $\varepsilon$ ,  $\tau$ ,  $S_{\text{catal.}}$ , and  $\rho_{\text{catal.,g}}$  are the average pore radius, porosity, tortuosity, surface areas, and grain density of catalyst, respectively,  $T$  and  $M_i$  are the temperature and relative molecular weight of component  $i$ , respectively, and  $D_A$  is the free diffusion coefficient, which can be obtained from Aspen Plus software.

The data used in the above-mentioned equations and the calculations of the Mears and Weisz-Prater parameters are shown in Tables S2 and S3. Both external and internal mass transfer limitations can be excluded for all the kinetic study cases, as  $C_M$  and  $C_{WP}$  are less than 0.15 and 1, respectively.

## References

1. H.S. Fogler, Diffusion and reaction in Elements of Chemical Reaction Engineering; Pearson Education Inc.: New York, 2016, pp 734-743.
2. T.R. Marrero, E.A. Mason, Gaseous diffusion coefficients, Journal of Physical and Chemical Reference Data, 1972, 1, 1-118.

**Table S1** Physicochemical properties of TiO<sub>2</sub> and RuO<sub>2</sub>/TiO<sub>2</sub> catalysts

**Table S2** Measured reaction rates over RuO<sub>2</sub>/TiO<sub>2</sub> catalysts at different reaction temperatures for  $E_a$  calculations

**Table S3** Data for calculating the Mears and Weisz-Prater criterion parameters

**Table S4** Evaluation of the Mears ( $C_M$ ) and Weisz-Prater ( $C_{WP}$ ) criterion parameters

**Fig. S1** Wide-angle XRD patterns of RuO<sub>2</sub>/TiO<sub>2</sub>-150 (a), RuO<sub>2</sub>/TiO<sub>2</sub>-200 (b), RuO<sub>2</sub>/TiO<sub>2</sub>-250 (c), RuO<sub>2</sub>/TiO<sub>2</sub>-300 (d), and RuO<sub>2</sub>/TiO<sub>2</sub>-350 (e). The standard pattern of rutile-type TiO<sub>2</sub> (JCPDS No. 21-1276) is shown at the bottom of the figure.

**Fig. S2** SEM image of TiO<sub>2</sub>.

**Fig. S3** Ru 3d XPS spectrum of RuCl<sub>3</sub>/TiO<sub>2</sub>.

**Fig. S4** Cl 2p XPS spectra of RuCl<sub>3</sub>/TiO<sub>2</sub> (A), RuO<sub>2</sub>/TiO<sub>2</sub>-150 (B), RuO<sub>2</sub>/TiO<sub>2</sub>-200 (C), RuO<sub>2</sub>/TiO<sub>2</sub>-250 (D), RuO<sub>2</sub>/TiO<sub>2</sub>-300 (E), and RuO<sub>2</sub>/TiO<sub>2</sub>-350 (F).

**Fig. S5** EDX mapping images of Cl for RuCl<sub>3</sub>/TiO<sub>2</sub> (A), RuO<sub>2</sub>/TiO<sub>2</sub>-150 (B), RuO<sub>2</sub>/TiO<sub>2</sub>-200 (C), RuO<sub>2</sub>/TiO<sub>2</sub>-250 (D), RuO<sub>2</sub>/TiO<sub>2</sub>-300 (E), and RuO<sub>2</sub>/TiO<sub>2</sub>-350 (F).

**Fig. S6** TEM (A, E) and EDX mapping images of Ru (B, F), O (C, G), and Ti (D, H) for RuO<sub>2</sub>/TiO<sub>2</sub>-250 (A-D) and RuO<sub>2</sub>/TiO<sub>2</sub>-350 (E-H).

**Fig. S7** Effects of HCl flow rate and reaction temperature on the catalytic activities in the oxidation of HCl with O<sub>2</sub> over different RuO<sub>2</sub>/TiO<sub>2</sub> catalysts. Reaction conditions: catalyst particle sizes = 0.180-0.250 mm, WHSV (HCl) = 2933 h<sup>-1</sup>, and molar ratio of HCl to O<sub>2</sub> = 4 : 1.

**Fig. S8** Effects of catalyst particle size and reaction temperature on the catalytic activities in the oxidation of HCl with O<sub>2</sub> over different RuO<sub>2</sub>/TiO<sub>2</sub> catalysts. Reaction

conditions: WHSV (HCl) = 2933 h<sup>-1</sup> and molar ratio of HCl to O<sub>2</sub> = 4 : 1.

**Fig. S9** Heat flow and MS signals in the microcalorimetric measurements on the pulse adsorption of O<sub>2</sub> on RuO<sub>2</sub>/TiO<sub>2</sub>-250 (A, B) and RuO<sub>2</sub>/TiO<sub>2</sub>-350 (C, D), respectively, as a function of time at 350 °C.

**Fig. S10** Raman spectra of the fresh RuO<sub>2</sub>/TiO<sub>2</sub>-350 (a) and the used RuO<sub>2</sub>/TiO<sub>2</sub>-350 (b). The used catalyst represents the catalyst after 32 h of the reaction at 350 °C, and the reaction conditions were the same as those described in the caption of Fig. 4.

**Fig. S11** Effects of WHSV on the oxidation of HCl over RuO<sub>2</sub>/TiO<sub>2</sub>-250. Reaction conditions: molar ratio of HCl to O<sub>2</sub> = 1 : 1 and reaction temperature = 350 °C.

**Table S1** Physicochemical properties of TiO<sub>2</sub> and RuO<sub>2</sub>/TiO<sub>2</sub> catalysts

| Samples                                 | Ru loading <sup>a</sup><br>(wt.%) | $S_{\text{BET}}^{\text{b}}$<br>(m <sup>2</sup> g <sup>-1</sup> ) | $S_{\text{ext}}^{\text{c}}$<br>(m <sup>2</sup> g <sup>-1</sup> ) | $V_{\text{micro}}^{\text{c}}$<br>(cm <sup>3</sup> g <sup>-1</sup> ) | $V_{\text{total}}^{\text{d}}$<br>(cm <sup>3</sup> g <sup>-1</sup> ) |
|-----------------------------------------|-----------------------------------|------------------------------------------------------------------|------------------------------------------------------------------|---------------------------------------------------------------------|---------------------------------------------------------------------|
| TiO <sub>2</sub>                        | -                                 | 34.8                                                             | 34.7                                                             | 0.0                                                                 | 0.25                                                                |
| RuO <sub>2</sub> /TiO <sub>2</sub> -150 | 2.1                               | 35.8                                                             | 34.7                                                             | 0.0                                                                 | 0.25                                                                |
| RuO <sub>2</sub> /TiO <sub>2</sub> -200 | 2.0                               | 36.3                                                             | 35.0                                                             | 0.0                                                                 | 0.26                                                                |
| RuO <sub>2</sub> /TiO <sub>2</sub> -250 | 2.0                               | 36.8                                                             | 34.5                                                             | 0.0                                                                 | 0.27                                                                |
| RuO <sub>2</sub> /TiO <sub>2</sub> -300 | 1.9                               | 34.9                                                             | 33.8                                                             | 0.0                                                                 | 0.27                                                                |
| RuO <sub>2</sub> /TiO <sub>2</sub> -350 | 2.0                               | 35.4                                                             | 35.0                                                             | 0.0                                                                 | 0.26                                                                |

<sup>a</sup> Determined from ICP-AES analysis.

<sup>b</sup> Determined from the measured N<sub>2</sub> adsorption-desorption isotherms at -196 °C using the Brunauer-Emmett-Teller (BET) method.

<sup>c</sup> Determined from the measured N<sub>2</sub> adsorption-desorption isotherms at -196 °C using the *t*-plot method.

<sup>d</sup> Determined from the N<sub>2</sub> adsorption isotherm at -196 °C using the single-point method at a relative pressure of 0.995.

**Table S2** Measured reaction rates over RuO<sub>2</sub>/TiO<sub>2</sub> catalysts at different reaction temperatures for  $E_a$  calculations<sup>a</sup>

| Catalyst                                | Temperature<br>(°C) | HCl conversion<br>(%) | Reaction rate<br>( $\times 10^{-4}$ mol g <sup>-1</sup> s <sup>-1</sup> ) |
|-----------------------------------------|---------------------|-----------------------|---------------------------------------------------------------------------|
| RuO <sub>2</sub> /TiO <sub>2</sub> -150 | 330                 | 2.7                   | 6.03                                                                      |
|                                         | 335                 | 3.2                   | 7.15                                                                      |
|                                         | 340                 | 3.8                   | 8.48                                                                      |
|                                         | 345                 | 4.5                   | 10.04                                                                     |
|                                         | 350                 | 5.2                   | 11.61                                                                     |
|                                         | 355                 | 6.1                   | 13.62                                                                     |
|                                         | 360                 | 7.3                   | 16.29                                                                     |
| RuO <sub>2</sub> /TiO <sub>2</sub> -200 | 330                 | 3.3                   | 7.37                                                                      |
|                                         | 335                 | 3.9                   | 8.63                                                                      |
|                                         | 340                 | 4.5                   | 10.04                                                                     |
|                                         | 345                 | 5.3                   | 11.83                                                                     |
|                                         | 350                 | 6.1                   | 13.62                                                                     |
|                                         | 355                 | 7.1                   | 15.85                                                                     |
|                                         | 360                 | 8.2                   | 18.30                                                                     |
| RuO <sub>2</sub> /TiO <sub>2</sub> -250 | 330                 | 4.0                   | 8.97                                                                      |
|                                         | 335                 | 4.6                   | 10.34                                                                     |
|                                         | 340                 | 5.3                   | 11.83                                                                     |
|                                         | 345                 | 6.1                   | 13.62                                                                     |

|                                         |     |     |       |
|-----------------------------------------|-----|-----|-------|
|                                         | 350 | 7.1 | 15.85 |
|                                         | 355 | 7.9 | 17.63 |
|                                         | 360 | 9.1 | 20.31 |
| RuO <sub>2</sub> /TiO <sub>2</sub> -300 | 330 | 3.5 | 7.85  |
|                                         | 335 | 4.1 | 9.16  |
|                                         | 340 | 4.8 | 10.71 |
|                                         | 345 | 5.5 | 12.28 |
|                                         | 350 | 6.5 | 14.51 |
|                                         | 355 | 7.4 | 16.52 |
|                                         | 360 | 8.6 | 19.20 |
| RuO <sub>2</sub> /TiO <sub>2</sub> -350 | 330 | 1.1 | 2.56  |
|                                         | 335 | 1.4 | 3.10  |
|                                         | 340 | 1.7 | 3.79  |
|                                         | 345 | 2.0 | 4.46  |
|                                         | 350 | 2.4 | 5.36  |
|                                         | 355 | 2.9 | 6.47  |
|                                         | 360 | 3.5 | 7.81  |

<sup>a</sup> Reaction conditions: Catalyst particle sizes = 0.180-0.250 mm,  $V(\text{HCl}) = 300 \text{ mL min}^{-1}$ ,  $\text{WHSV}(\text{HCl}) = 2933 \text{ h}^{-1}$ , molar ratio of HCl to O<sub>2</sub> = 4 : 1. The reaction rates were measured after 1 h of the reaction.



**Table S3** Data for calculating the Mears and Weisz-Prater criterion parameters

| Parameters               | Values                   |
|--------------------------|--------------------------|
| $\rho_{\text{catal.}}$   | 1141 kg m <sup>-3</sup>  |
| $R_{\text{catal.}}$      | 0.180-0.250 mm           |
| $\rho_{\text{catal.,g}}$ | 4,260 kg m <sup>-3</sup> |
| $\varepsilon$            | 0.65                     |
| $\tau^{\text{a}}$        | 3                        |

<sup>a</sup> The pore tortuosity is assumed as 3 for a spherical catalyst particle.

**Table S4** Evaluation of the Mears ( $C_M$ ) and Weisz-Prater ( $C_{WP}$ ) criterion parameters<sup>a</sup>

| Catalyst                                | Temperature (°C) | $C_M$                                       | $C_{WP}$                                    |
|-----------------------------------------|------------------|---------------------------------------------|---------------------------------------------|
| RuO <sub>2</sub> /TiO <sub>2</sub> -150 | 330              | $2.7 \times 10^{-2}$ - $3.8 \times 10^{-2}$ | $1.1 \times 10^{-2}$ - $1.6 \times 10^{-2}$ |
|                                         | 335              | $3.2 \times 10^{-2}$ - $4.4 \times 10^{-2}$ | $1.3 \times 10^{-2}$ - $1.9 \times 10^{-2}$ |
|                                         | 340              | $3.8 \times 10^{-2}$ - $5.2 \times 10^{-2}$ | $1.5 \times 10^{-2}$ - $2.2 \times 10^{-2}$ |
|                                         | 345              | $4.5 \times 10^{-2}$ - $6.1 \times 10^{-2}$ | $1.8 \times 10^{-2}$ - $2.6 \times 10^{-2}$ |
|                                         | 350              | $5.1 \times 10^{-2}$ - $7.1 \times 10^{-2}$ | $2.1 \times 10^{-2}$ - $3.0 \times 10^{-2}$ |
|                                         | 355              | $6.0 \times 10^{-2}$ - $8.3 \times 10^{-2}$ | $2.4 \times 10^{-2}$ - $3.5 \times 10^{-2}$ |
|                                         | 360              | $7.2 \times 10^{-2}$ - $9.8 \times 10^{-2}$ | $2.9 \times 10^{-2}$ - $4.2 \times 10^{-2}$ |
| RuO <sub>2</sub> /TiO <sub>2</sub> -200 | 330              | $3.3 \times 10^{-2}$ - $4.6 \times 10^{-2}$ | $1.3 \times 10^{-2}$ - $1.9 \times 10^{-2}$ |
|                                         | 335              | $3.9 \times 10^{-2}$ - $5.4 \times 10^{-2}$ | $1.6 \times 10^{-2}$ - $2.3 \times 10^{-2}$ |
|                                         | 340              | $4.5 \times 10^{-2}$ - $6.2 \times 10^{-2}$ | $1.8 \times 10^{-2}$ - $2.6 \times 10^{-2}$ |
|                                         | 345              | $5.3 \times 10^{-2}$ - $7.2 \times 10^{-2}$ | $2.1 \times 10^{-2}$ - $3.1 \times 10^{-2}$ |
|                                         | 350              | $6.0 \times 10^{-2}$ - $8.3 \times 10^{-2}$ | $2.1 \times 10^{-2}$ - $3.5 \times 10^{-2}$ |
|                                         | 355              | $7.0 \times 10^{-2}$ - $1.1 \times 10^{-1}$ | $2.8 \times 10^{-2}$ - $4.1 \times 10^{-2}$ |
|                                         | 360              | $8.1 \times 10^{-2}$ - $2.1 \times 10^{-2}$ | $3.3 \times 10^{-2}$ - $4.7 \times 10^{-2}$ |
| RuO <sub>2</sub> /TiO <sub>2</sub> -250 | 330              | $4.0 \times 10^{-2}$ - $5.6 \times 10^{-2}$ | $1.6 \times 10^{-2}$ - $2.4 \times 10^{-2}$ |
|                                         | 335              | $4.6 \times 10^{-2}$ - $6.4 \times 10^{-2}$ | $1.9 \times 10^{-2}$ - $2.7 \times 10^{-2}$ |
|                                         | 340              | $5.3 \times 10^{-2}$ - $7.3 \times 10^{-2}$ | $2.1 \times 10^{-2}$ - $3.1 \times 10^{-2}$ |
|                                         | 345              | $6.1 \times 10^{-2}$ - $8.3 \times 10^{-2}$ | $2.5 \times 10^{-2}$ - $3.5 \times 10^{-2}$ |
|                                         | 350              | $7.0 \times 10^{-2}$ - $9.6 \times 10^{-2}$ | $2.8 \times 10^{-2}$ - $4.1 \times 10^{-2}$ |
|                                         | 355              | $7.8 \times 10^{-2}$ - $1.1 \times 10^{-1}$ | $3.2 \times 10^{-2}$ - $4.5 \times 10^{-2}$ |

|                                         |     |                                           |                                           |
|-----------------------------------------|-----|-------------------------------------------|-------------------------------------------|
|                                         | 360 | $8.9 \times 10^{-2} - 1.2 \times 10^{-1}$ | $3.6 \times 10^{-2} - 5.2 \times 10^{-2}$ |
| RuO <sub>2</sub> /TiO <sub>2</sub> -300 | 330 | $3.5 \times 10^{-2} - 4.9 \times 10^{-2}$ | $1.4 \times 10^{-2} - 2.1 \times 10^{-2}$ |
|                                         | 335 | $4.1 \times 10^{-2} - 5.7 \times 10^{-2}$ | $1.7 \times 10^{-2} - 2.4 \times 10^{-2}$ |
|                                         | 340 | $4.8 \times 10^{-2} - 6.6 \times 10^{-2}$ | $1.9 \times 10^{-2} - 2.8 \times 10^{-2}$ |
|                                         | 345 | $5.5 \times 10^{-2} - 7.5 \times 10^{-2}$ | $2.2 \times 10^{-2} - 3.2 \times 10^{-2}$ |
|                                         | 350 | $6.4 \times 10^{-2} - 8.8 \times 10^{-2}$ | $2.6 \times 10^{-2} - 3.8 \times 10^{-2}$ |
|                                         | 355 | $7.3 \times 10^{-2} - 1.0 \times 10^{-1}$ | $3.0 \times 10^{-2} - 4.3 \times 10^{-2}$ |
|                                         | 360 | $8.4 \times 10^{-2} - 1.2 \times 10^{-1}$ | $3.4 \times 10^{-2} - 4.9 \times 10^{-2}$ |
| RuO <sub>2</sub> /TiO <sub>2</sub> -350 | 330 | $1.1 \times 10^{-2} - 1.5 \times 10^{-2}$ | $4.5 \times 10^{-3} - 6.5 \times 10^{-3}$ |
|                                         | 335 | $1.4 \times 10^{-2} - 1.9 \times 10^{-2}$ | $5.7 \times 10^{-3} - 8.2 \times 10^{-3}$ |
|                                         | 340 | $1.7 \times 10^{-2} - 2.3 \times 10^{-2}$ | $6.9 \times 10^{-3} - 9.9 \times 10^{-3}$ |
|                                         | 345 | $2.0 \times 10^{-2} - 2.7 \times 10^{-2}$ | $8.1 \times 10^{-3} - 1.2 \times 10^{-2}$ |
|                                         | 350 | $2.4 \times 10^{-2} - 3.3 \times 10^{-2}$ | $9.6 \times 10^{-3} - 1.4 \times 10^{-2}$ |
|                                         | 355 | $2.9 \times 10^{-2} - 3.9 \times 10^{-2}$ | $1.2 \times 10^{-2} - 1.7 \times 10^{-2}$ |
|                                         | 360 | $3.4 \times 10^{-2} - 4.7 \times 10^{-2}$ | $1.4 \times 10^{-2} - 2.0 \times 10^{-2}$ |

<sup>a</sup> Reaction conditions: Catalyst particle sizes = 0.180-0.250 mm,  $V$  (HCl) = 300 mL min<sup>-1</sup>, WHSV (HCl) = 2933 h<sup>-1</sup>, molar ratio of HCl to O<sub>2</sub> = 4 : 1.

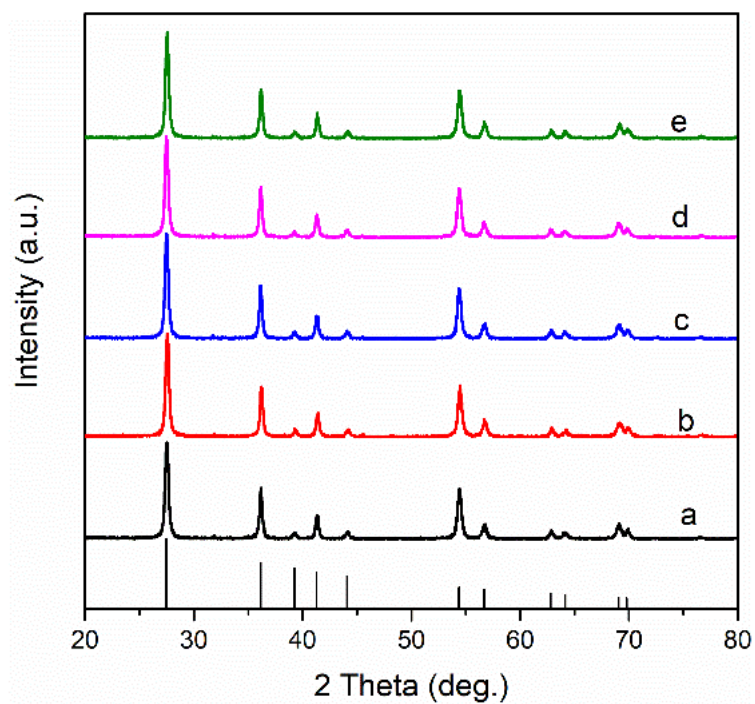

**Fig. S1** Wide-angle XRD patterns of RuO<sub>2</sub>/TiO<sub>2</sub>-150 (a), RuO<sub>2</sub>/TiO<sub>2</sub>-200 (b), RuO<sub>2</sub>/TiO<sub>2</sub>-250 (c), RuO<sub>2</sub>/TiO<sub>2</sub>-300 (d), and RuO<sub>2</sub>/TiO<sub>2</sub>-350 (e). The standard pattern of rutile-type TiO<sub>2</sub> (JCPDS No. 21-1276) is shown at the bottom of the figure.

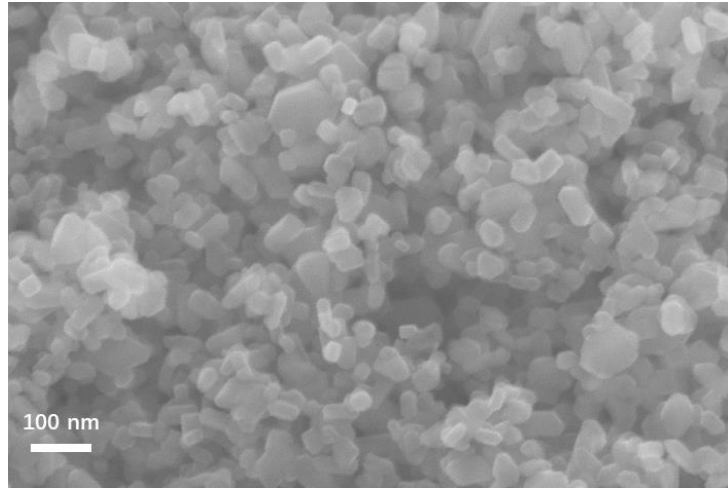

**Fig. S2** SEM image of TiO<sub>2</sub>.

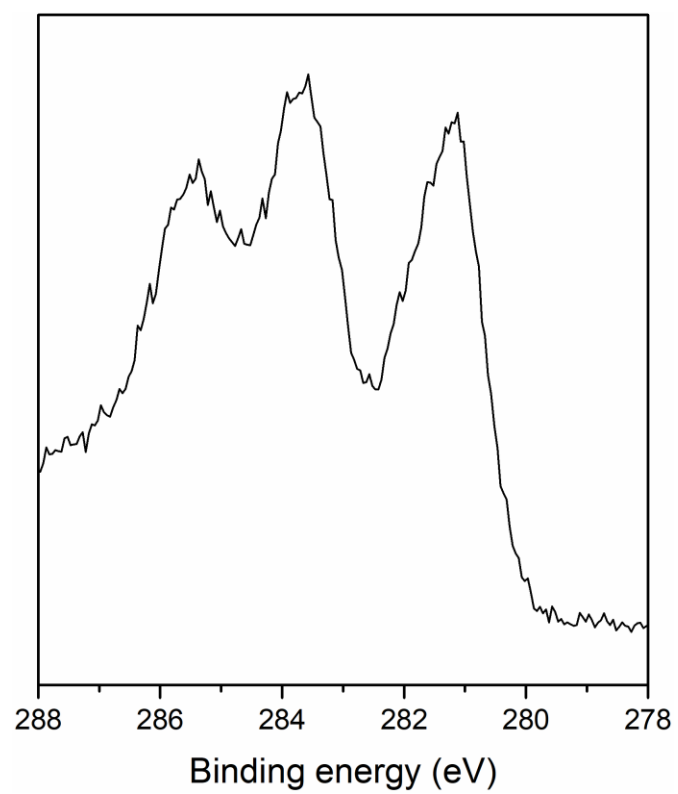

**Fig. S3** Ru 3d XPS spectrum of RuCl<sub>3</sub>/TiO<sub>2</sub>.

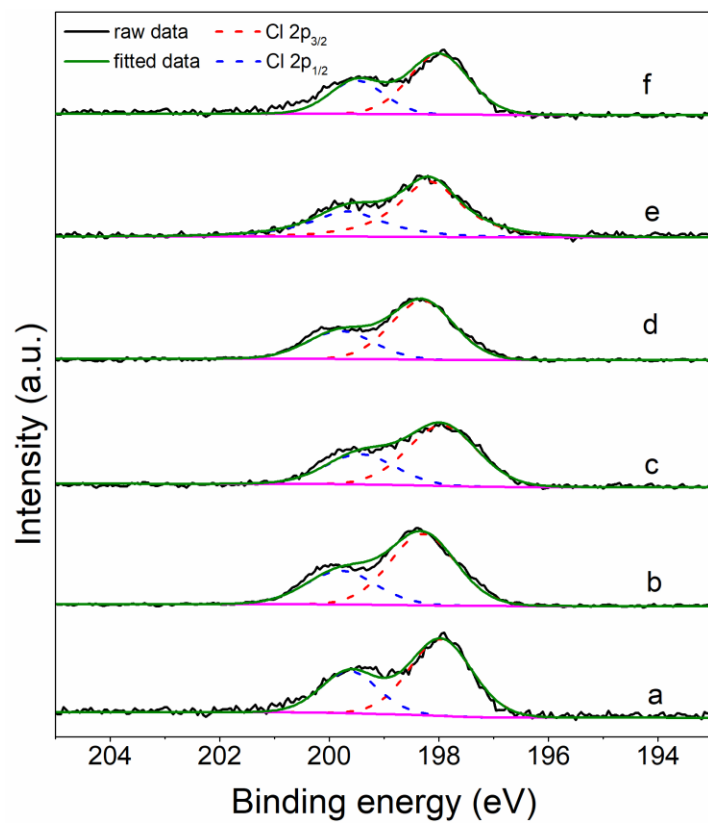

**Fig. S4** Cl 2p XPS spectra of RuCl<sub>3</sub>/TiO<sub>2</sub> (a), RuO<sub>2</sub>/TiO<sub>2</sub>-150 (b), RuO<sub>2</sub>/TiO<sub>2</sub>-200 (c), RuO<sub>2</sub>/TiO<sub>2</sub>-250 (d), RuO<sub>2</sub>/TiO<sub>2</sub>-300 (e), and RuO<sub>2</sub>/TiO<sub>2</sub>-350 (f).

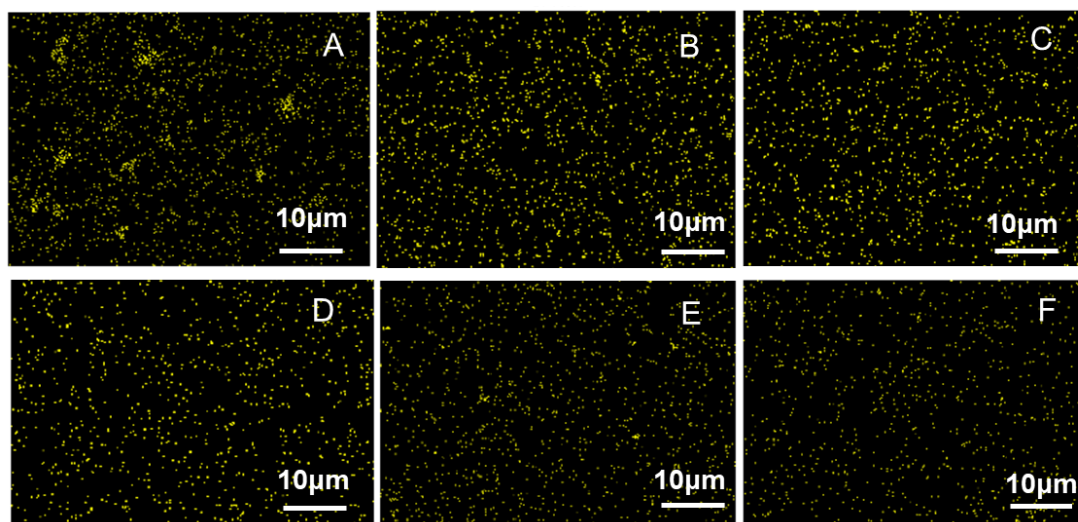

**Fig. S5** EDX mapping images of Cl for  $\text{RuCl}_3/\text{TiO}_2$  (A),  $\text{RuO}_2/\text{TiO}_2$ -150 (B),  $\text{RuO}_2/\text{TiO}_2$ -200 (C),  $\text{RuO}_2/\text{TiO}_2$ -250 (D),  $\text{RuO}_2/\text{TiO}_2$ -300 (E), and  $\text{RuO}_2/\text{TiO}_2$ -350 (F).



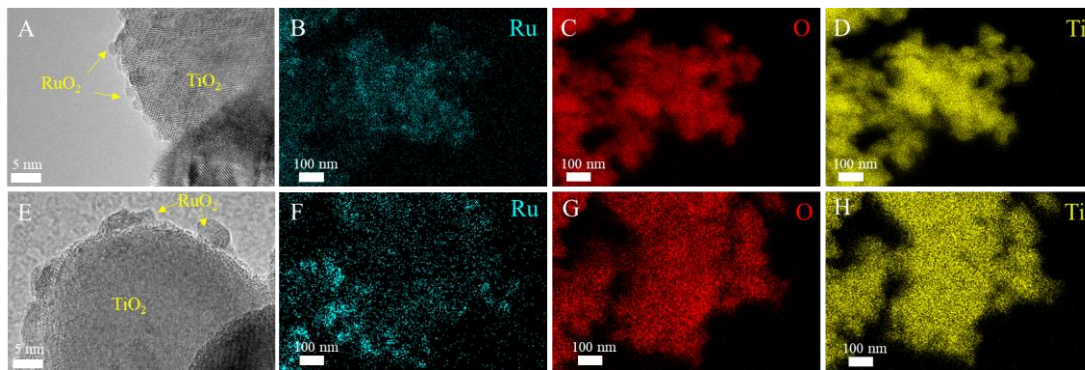

**Fig. S6** TEM (A, E) and EDX mapping images of Ru (B, F), O (C, G), and Ti (D, H) of RuO<sub>2</sub>/TiO<sub>2</sub>-250 (A-D) and RuO<sub>2</sub>/TiO<sub>2</sub>-350 (E-H).

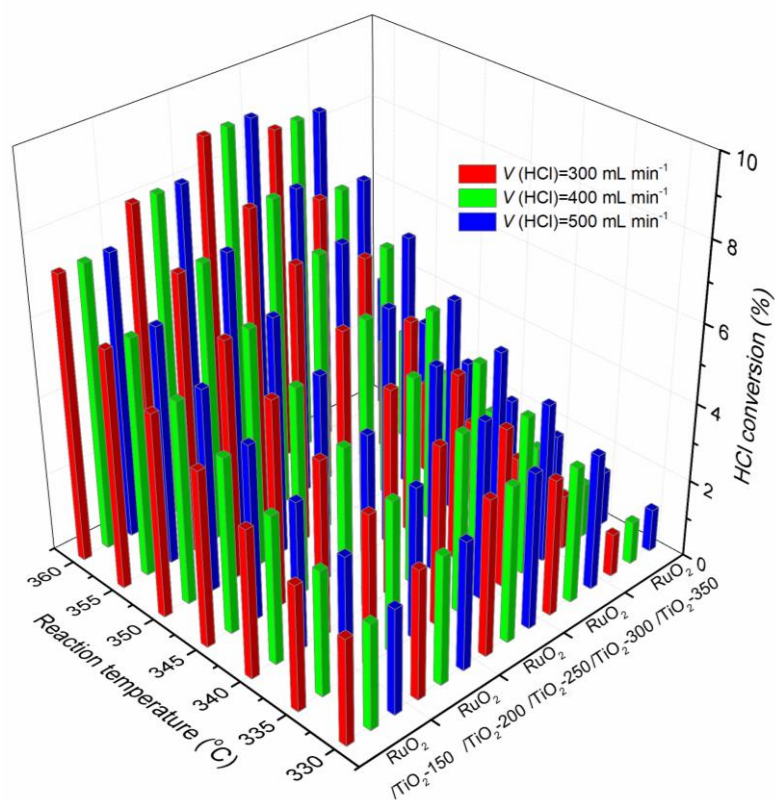

**Fig. S7** Effects of HCl flow rate and reaction temperature on the catalytic activities in the oxidation of HCl with O<sub>2</sub> over different RuO<sub>2</sub>/TiO<sub>2</sub> catalysts. Reaction conditions: catalyst particle sizes = 0.180-0.250 mm, WHSV (HCl) = 2933 h<sup>-1</sup>, and molar ratio of HCl to O<sub>2</sub> = 4 : 1.

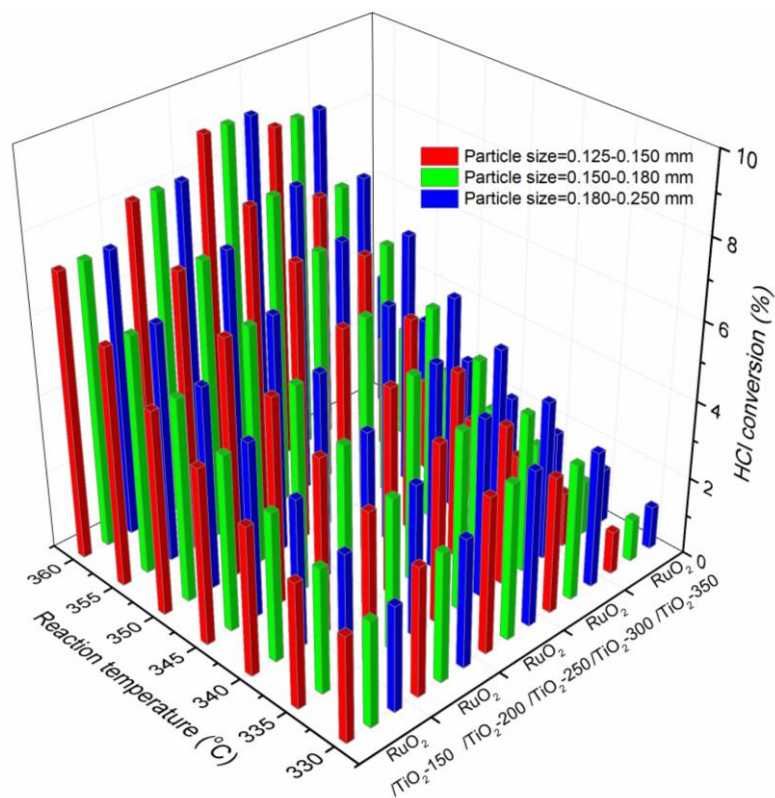

**Fig. S8** Effects of catalyst particle size and reaction temperature on the catalytic activities in the oxidation of HCl with O<sub>2</sub> over different RuO<sub>2</sub>/TiO<sub>2</sub> catalysts. Reaction conditions: WHSV (HCl) = 2933 h<sup>-1</sup> and molar ratio of HCl to O<sub>2</sub> = 4 : 1.

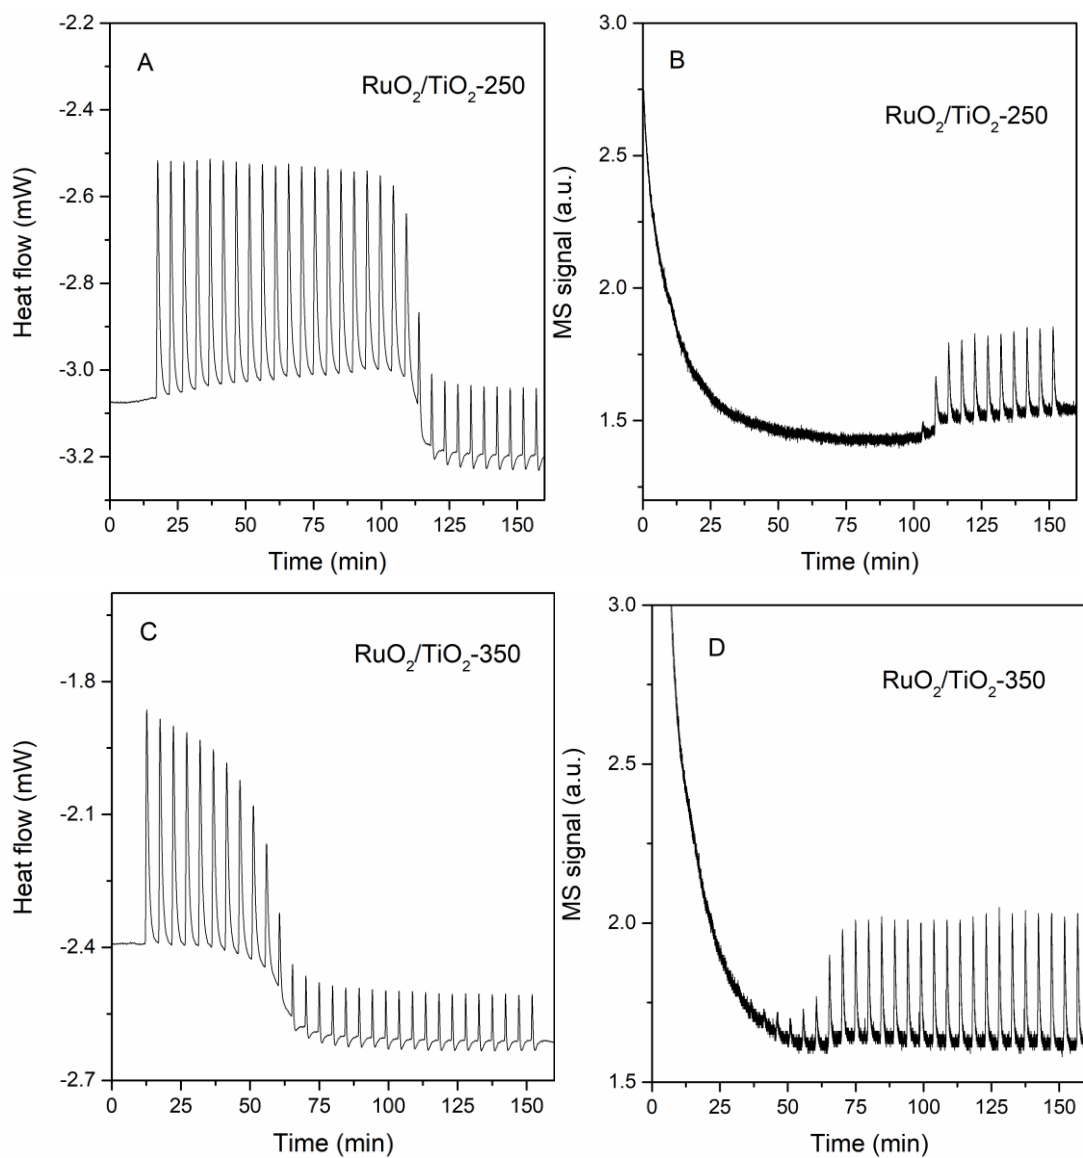

**Fig. S9** Heat flow and MS signals in the microcalorimetric measurements on the pulse adsorption of O<sub>2</sub> on RuO<sub>2</sub>/TiO<sub>2</sub>-250 (A, B) and RuO<sub>2</sub>/TiO<sub>2</sub>-350 (C, D), respectively, as a function of time at 350 °C.

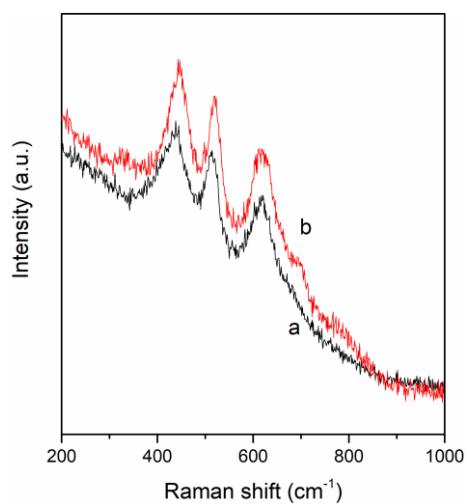

**Fig. S10** Raman spectra of the fresh RuO<sub>2</sub>/TiO<sub>2</sub>-350 (a) and the used RuO<sub>2</sub>/TiO<sub>2</sub>-350 (b). The used catalyst represents the catalyst after 32 h of the reaction at 350 °C, and the reaction conditions were the same as those described in the caption of Fig. 4.

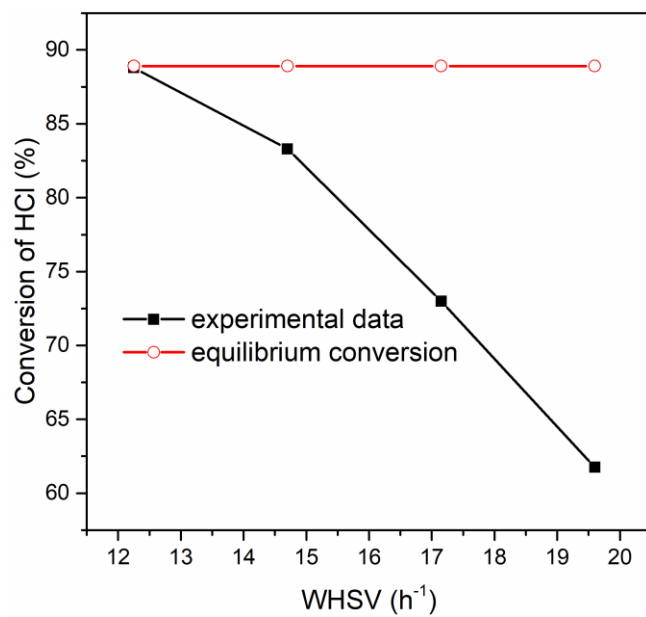

**Fig. S11** Effects of WHSV on the oxidation of HCl over RuO<sub>2</sub>/TiO<sub>2</sub>-250. Reaction conditions: molar ratio of HCl to O<sub>2</sub> = 1 : 1 and reaction temperature = 350 °C.
